# Supplementary material for: Protein aggregation and calcium dysregulation are hallmarks of familial Parkinson’s disease in midbrain dopaminergic neurons
Source: PubMed Central journal article supplement (PMC9691718; doi:10.1038/s41531-022-00423-7), 2022-11-24
Supplement: 41531_2022_423_MOESM1_ESM.pdf [file 41531_2022_423_MOESM1_ESM.pdf]

# Supplementary material

## Supplementary Figure 1

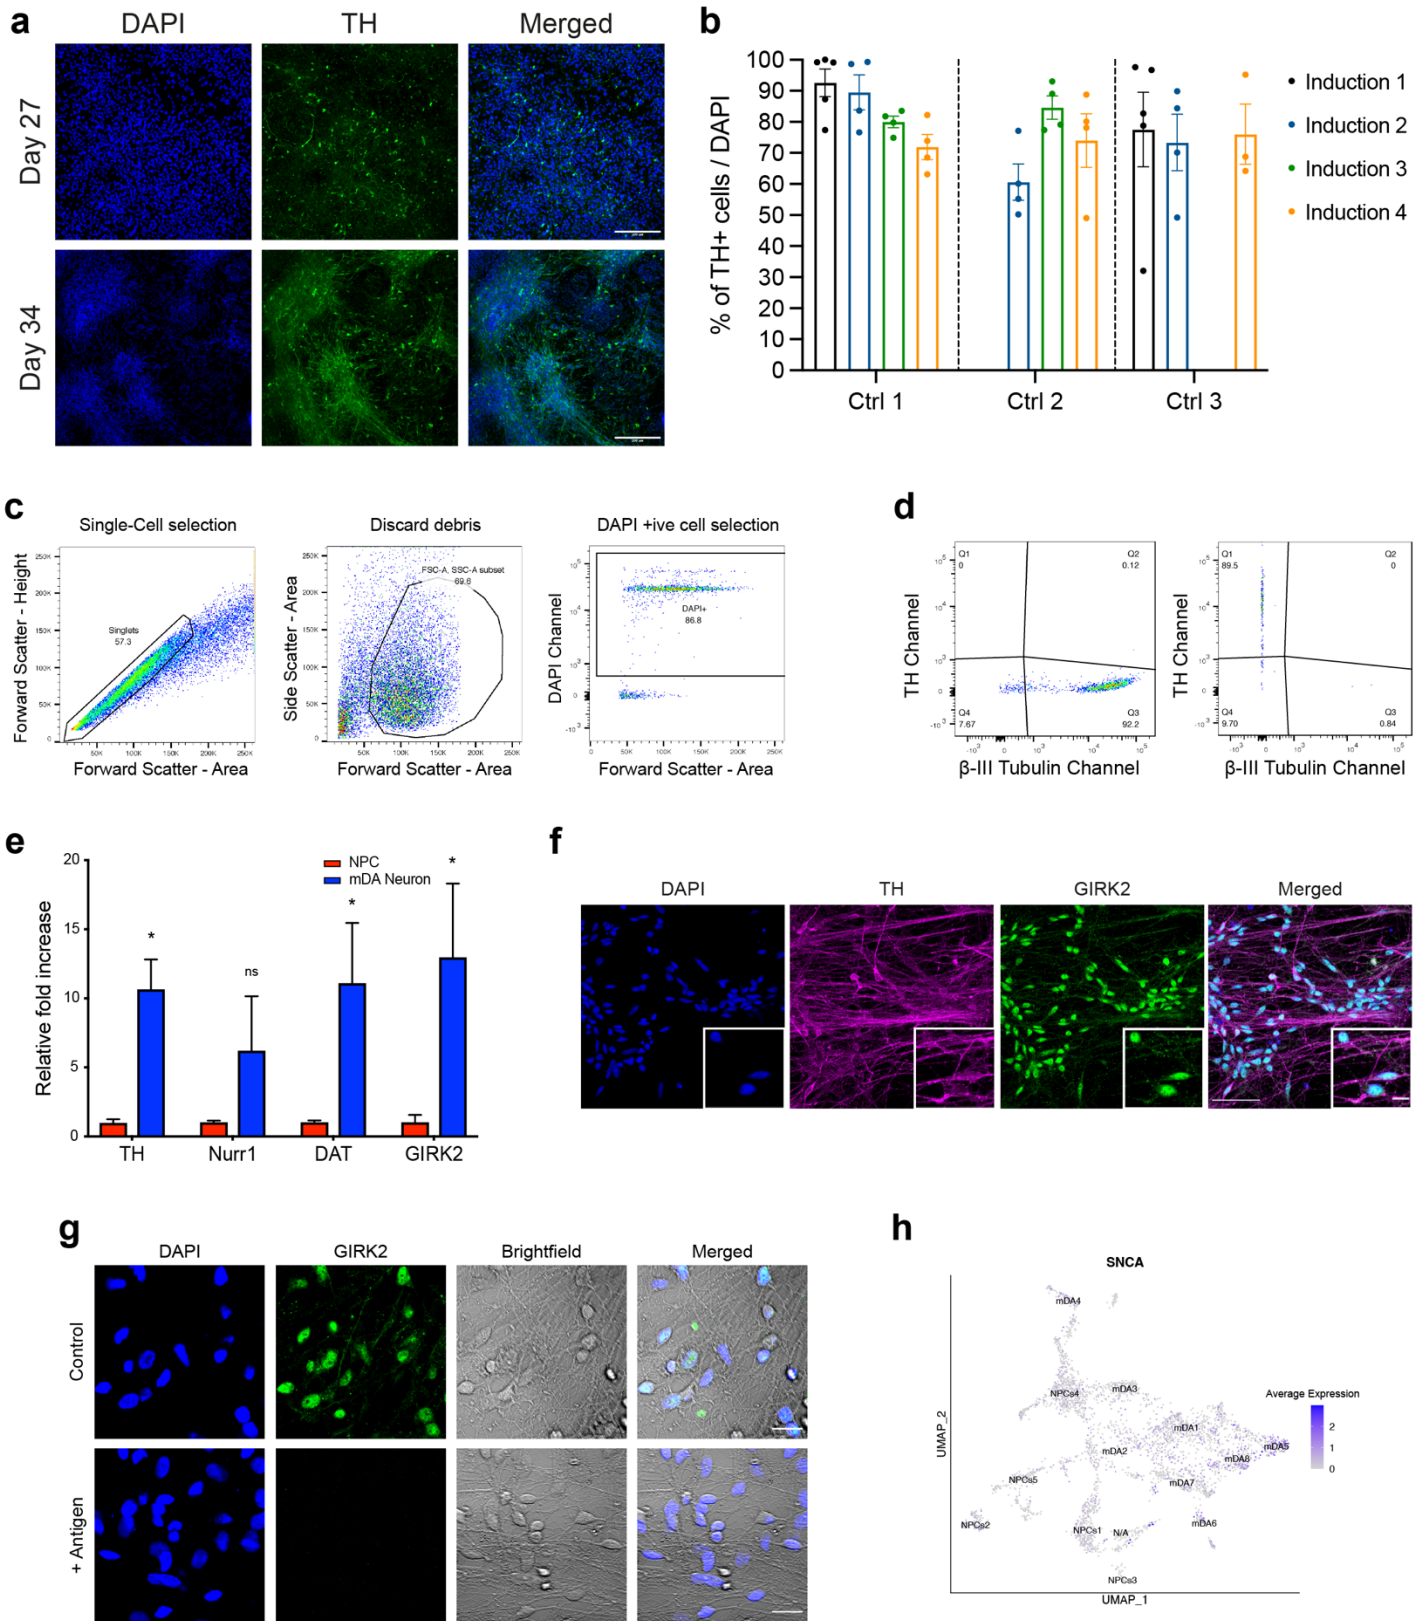

### Supplementary Figure 1 – Characterisation of mDA neurons.

**(A)** Representative ICC images showing the expression of TH increase from day 27 to day 34 of differentiation. Scale bar = 200  $\mu\text{m}$ . **(B)** Quantification of percentage of TH positive cells after 41 days of differentiation across hiPSC lines and inductions showing variability (Ctrl 1: 71.9-92.6%, Ctrl 2: 60.7-84.6%, Ctrl 3: 73.4-77.6%). **(C)** Dot plots showing the selection criteria for flow cytometry analysis. Using the forward scatter, only single cells were selected. Next, in the middle dot plot, cluster was selected discarding any debris. Finally, only the DAPI positive cells were selected. **(D)** Dot plots showing the thresholding gating for the channels measured. Thresholding gates were determined using the fluorescence minus one (FMO) control. In the first dot plot, the TH gate threshold was set by measuring the intensity in the sample with all immunolabelling except TH. The same was done for the  $\beta$ -III Tubulin gate threshold in the right dot plot **(E)** Quantitative PCR showing an up-regulation of mRNA of mature mDA markers *TH*, *Nurr1*, *DAT*, and *GIRK2* relative to mDA NPCs (*TH* =  $10.6 \pm 2.2$ , *Nurr1* =  $6.2 \pm 3.4$ , *DAT* =  $11.1 \pm 4.4$ , *GIRK2* =  $12.9 \pm 5.4$ , ns  $p > 0.05$ , \*  $p < 0.05$ , two-way ANOVA). **(F)** Representative ICC images showing expression of TH and GIRK2. Scale bar = 50  $\mu\text{m}$ . Smaller image depicts a zoomed-in version of the image showing co-expression of TH and GIRK2. Scale bar = 10  $\mu\text{m}$ . **(G)** GIRK2 Antibody specificity was confirmed using the control antigen. The top panel shows GIRK2 using the antibody as normal. The lower panel shows GIRK2 immunolabelling is abolished when the antibody was incubated with the antigen (GIRK2 sequence). Scale bar = 20  $\mu\text{m}$ . **(H)** A feature plot showing the expression of *SNCA* in all the clusters identified through single-cell RNA-seq at day 48 of differentiation. All values plotted as  $\pm$ SEM. All N numbers for each experiment can be found in supplementary table 5.

# Supplementary Figure 2

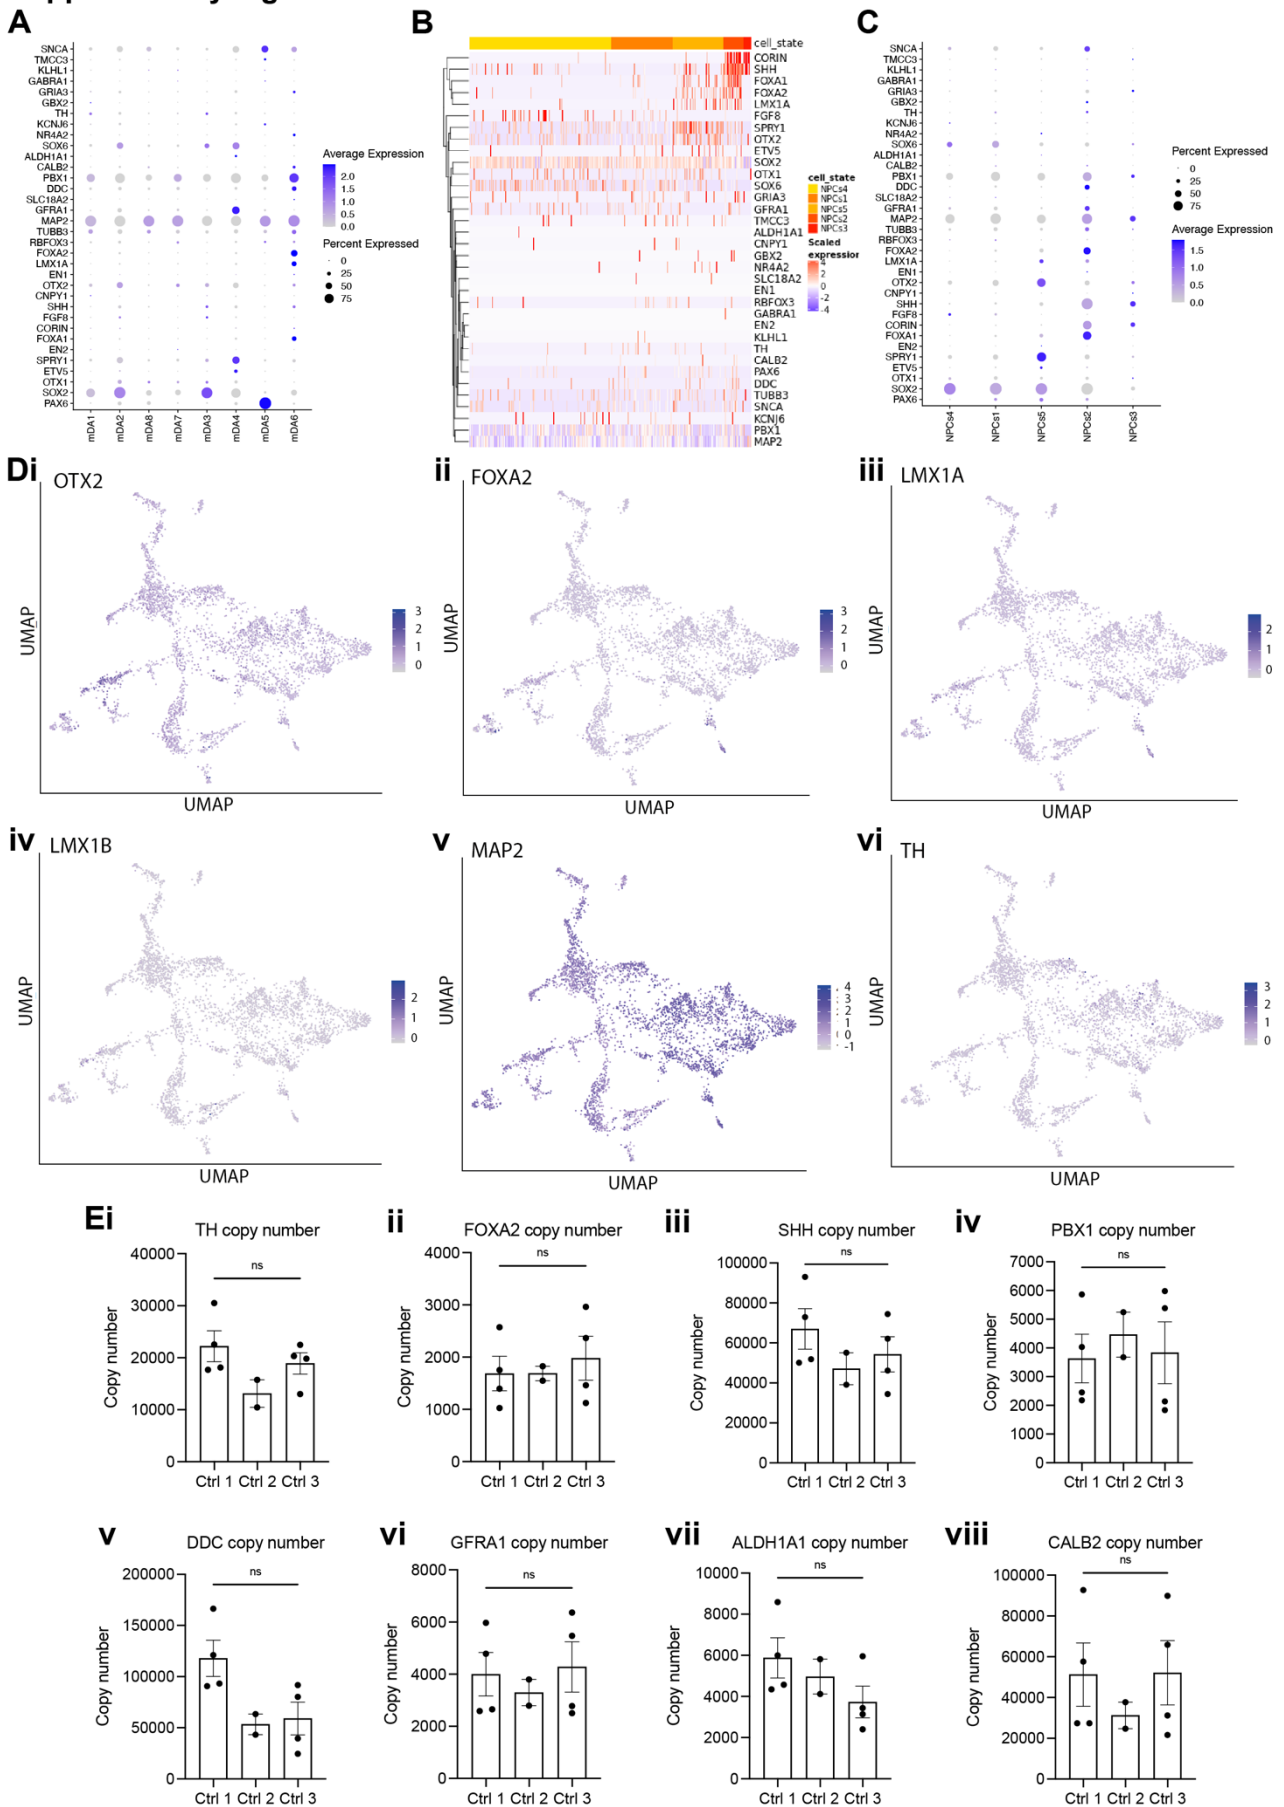

**Supplementary Figure 2 – RNAseq UMAP plots for the key markers of mDA neurons.**

**(A)** A dot-plot showing the gene expression profile of the mDA clusters (mDA1-8) identified in single-cell RNA-seq. Genes corresponding to mDA NPC markers and mDA neuron markers are shown. Expression of the genes is coloured based on the expression fold difference and plotted based on the percentage of cells in that cluster expressing the gene. **(B)** A heat map showing the expression of genes in the clusters identified as mDA NPCs (NPCs1-5). Each line represents a cell from that cluster. **(C)** A dot-plot showing the gene expression profile of the mDA NPC clusters. Genes corresponding to mDA NPC markers and mDA neuron markers are shown. **(D)** UMAP feature plots showing percentage gene expression for the key markers **i:** OTX2, **ii:** FOXA2, **iii:** LMX1A, **iv:** LMX1B, **v:** MAP2 and **vi:** TH) of mDA neurons identified from single-cell RNA-seq. **(E)** Bar graphs showing the quantification of copy number proteomic analysis for key mDA proteins: **i:** TH, **ii:** FOXA2, **iii:** SHH, **iv:** PBX1, **v:** DDC, **vi:** GFRA1, **vii:** ALDH1A1, **viii:** CALB2 ( $p > 0.05$ , one-way ANOVA). All values plotted as  $\pm$ SEM. All N numbers for each experiment can be found in supplementary table 5.



### Supplementary Figure 3 – RNA-velocity on mDA neurons.

**(A)** Phase portraits of some of the driver genes identified in each cluster. Blue dots represent mDA neuron clusters, yellow dots represent NPC clusters. Driver genes for neuronal clusters have higher amounts of neuronal cells at the top of the plot (*STMN2*) whereas driver genes for NPC clusters (*QKI*) have a higher amount of NPC cells at the top. Lines represent the "steady-state" ratio, i.e. the ratio of unspliced to spliced mRNA abundance which is in a constant transcriptional state. *QKI* for example is expressed (steady-state expression) more in NPCs, while it is not expressed in mDA neurons. *ELAVL4* on the other hand is expressed at a steady-state in mDA neurons and is up-regulated in NPCs. **(B)** A table showing the top 5 driver genes for each cluster identified through RNA-velocity. **(C)** PAGA analysis visualised in Figure 2C in a table showing the numeric expression of the transition confidences between clusters. All N numbers for each experiment can be found in supplementary table 5.

## Supplementary Figure 4

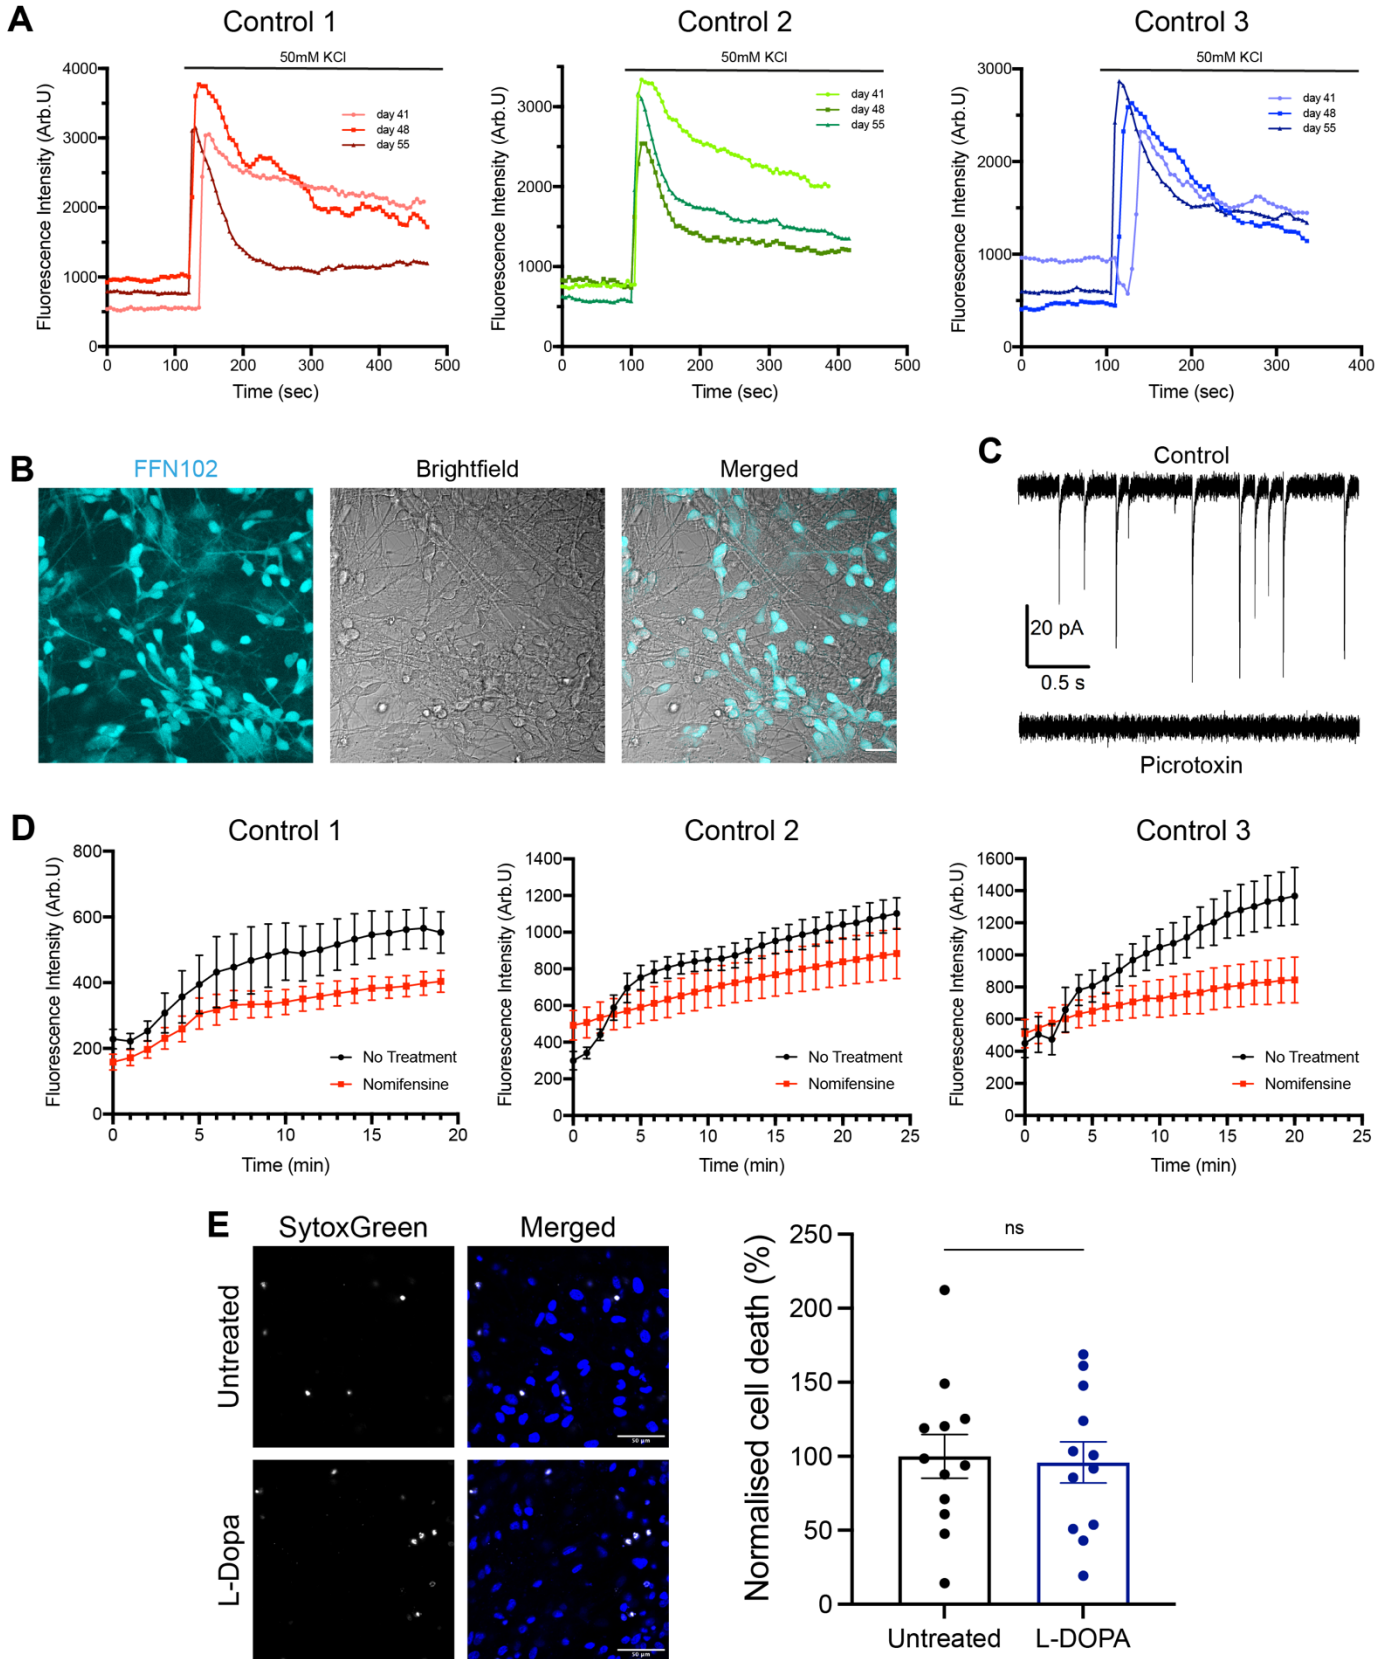

#### **Supplementary Figure 4 – Ca<sup>2+</sup> and DAT functionality in mDA neurons.**

**(A)** Traces showing the Fluo-4 mean fluorescence intensity for each hiPSC control line before and after the addition of 50mM KCl from day 41 to 55 of differentiation. Values plotted as the mean of all cells per time point of differentiation. **(B)** Live-cell imaging picture of cells after a 30-minute incubation with FFN, showing the dye enters most mDA neurons. Scale bar = 20  $\mu$ m. **(C)** Spontaneous postsynaptic activity in mDA neurons at day 70 of differentiation. Top trace: spontaneous postsynaptic currents. Bottom trace: 50 mM of picrotoxin suppresses spontaneous synaptic activity. **(D)** Traces showing the fluorescence intensity of FFN inside cells to measure the uptake of the dye in each hiPSC line tested, in the absence, or presence of DAT inhibitor nomifensine (n = 15-20 cells per condition). Values plotted as  $\pm$ SD. **(E)** Cell death assay of day 48 old mDA neurons in untreated and 24hr, 80  $\mu$ M L-DOPA treated samples. Dead cells are indicated with SytoxGreen signal. Bar graph on the right shows the normalised percentage of dead cells in both conditions (Untreated =  $100 \pm 14.8\%$ , L-Dopa =  $95 \pm 14.0\%$ , p > 0.05 unpaired t test). Scale bar = 50  $\mu$ m. Values plotted as  $\pm$ SEM. All N numbers for each experiment can be found in supplementary table 5.



## Supplementary Figure 5

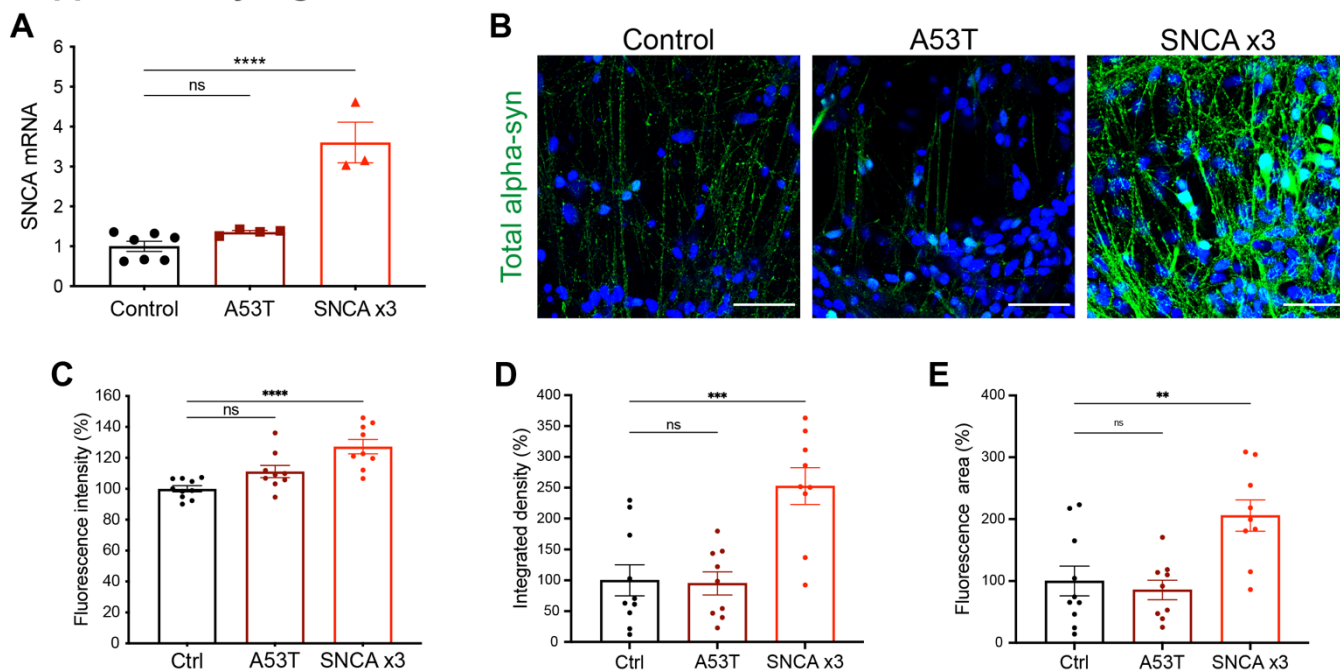

### Supplementary Figure 5 – $\alpha$ -synuclein expression in SNCA PD mDA neurons.

**(A)** Quantitative PCR showing relative mRNA expression of SNCA in mDA neurons at day 41 of differentiation (ns  $p > 0.05$ , \*\*\*\*  $p < 0.0001$ , one-way ANOVA). **(B)** Representative ICC images showing the expression of  $\alpha$ -synuclein at day 48 of differentiation. Scale bar = 50  $\mu$ m. **(C)** Quantification of the relative normalised fluorescence intensity of  $\alpha$ -synuclein in all lines (Ctrl =  $100 \pm 2$ , A53T =  $111 \pm 4$ , SNCA x3 =  $127 \pm 4.7$ , ns  $p > 0.05$ , \*\*\*\*  $p < 0.0001$ , one-way ANOVA). **(D)** Quantification showing the product of the area and fluorescence intensity of  $\alpha$ -synuclein (integrated density) in all lines (Ctrl =  $100 \pm 25$ , A53T =  $95 \pm 19$ , SNCA x3 =  $253 \pm 30$ , ns  $p > 0.05$ , \*\*\*  $p = 0.0006$ , one-way ANOVA). **(E)** Quantification showing the fluorescent area of  $\alpha$ -synuclein in all lines (Ctrl =  $100 \pm 24$ , A53T =  $86 \pm 16$ , SNCA x3 =  $206 \pm 25$ , ns  $p > 0.05$ , \*\*  $p < 0.005$ , one-way ANOVA). All values plotted as  $\pm$ SEM. All N numbers for each experiment can be found in supplementary table 5.

# Supplementary Figure 6

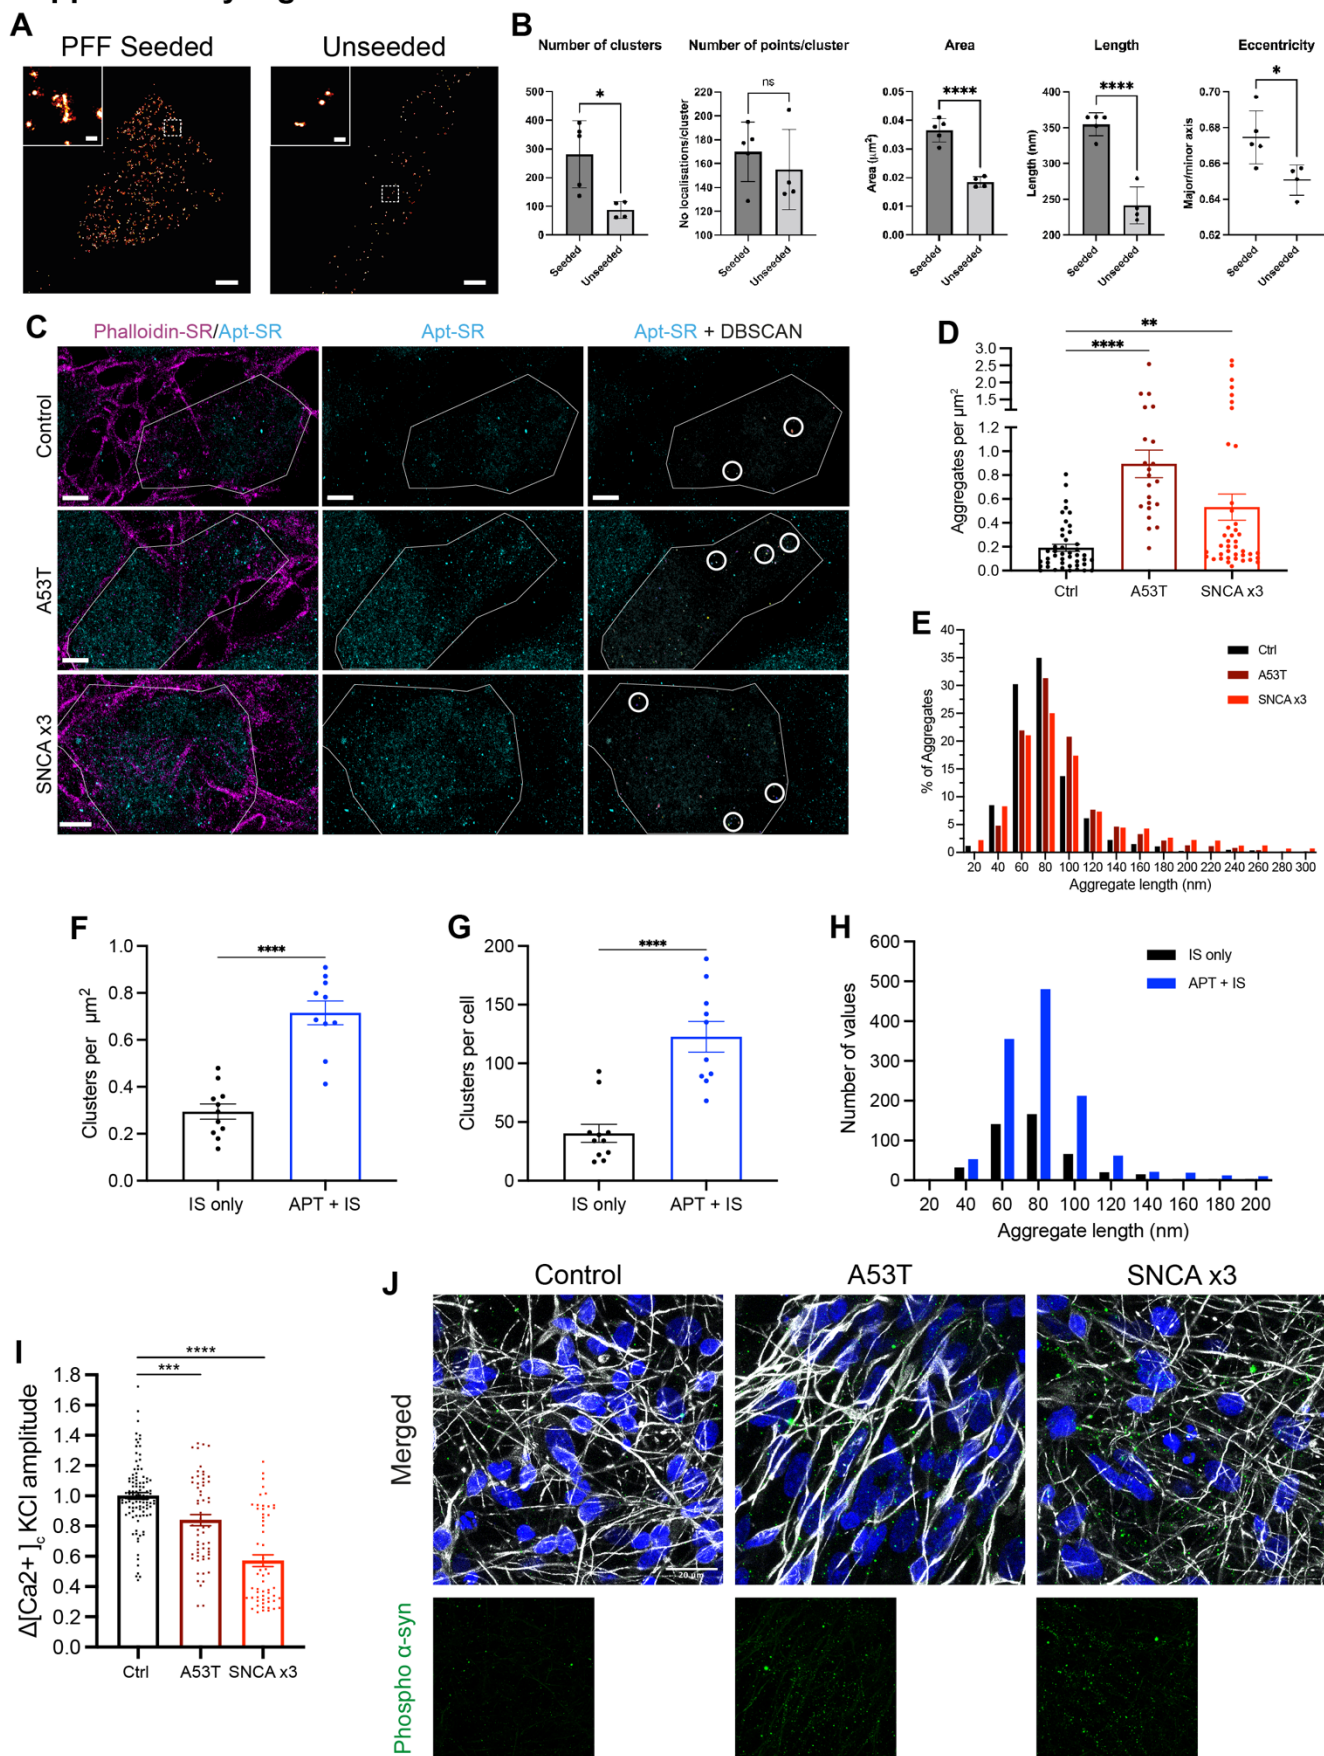

## Supplementary Figure 6 – Oligomer and aggregate detection in mDA neurons.

**(A)** Representative images of SH-SY5Y cells seeded (left) or unseeded (right) with  $\alpha$ -synuclein PFFs and imaged using SMLM AD-PAINT showing detectable aggregates. Scale bars: 5  $\mu$ m (big panel); 500 nm (small panel). **(B)** Quantification of clusters in  $\alpha$ Syn PFF seeded vs unseeded SH-SY5Y cells showing number of clusters per cell, localisations per cluster, area, length, and eccentricity of clusters. Each data point represents the mean value per image (ns  $p > 0.05$ , \*  $p < 0.05$ , \*\*\*\*  $p < 0.0001$ , unpaired t test). Values plotted as  $\pm$ SD. **(C)** SMLM images showing phalloidin in magenta and the aptamer in cyan in day 27 mDA neurons. White line shows the ROI of the cell identified. Middle panel shows only the SMLM aptamer. Final panel shows oligomers identified by DBSCAN (in different colours) with example clusters highlighted in circles. Scale bar = 2  $\mu$ m. **(D)** Graph showing the number of aggregates normalised to the area in each cell expressed as aggregate per  $\mu$ m<sup>2</sup> (Ctrl =  $0.19 \pm 0.03$ , A53T =  $0.89 \pm 0.12$ , SNCA x3 =  $0.53 \pm 0.11$ , \*\*  $p = 0.0058$ , \*\*\*\*  $p < 0.0001$ , one-way ANOVA). **(E)** Each aggregate plotted as a percentage of the total population (y-axis) showing the length of each aggregate binned in 20 nm intervals. **(F)** Graph showing the aggregates per  $\mu$ m<sup>2</sup> of each cell when samples were imaged with only the imaging strand (IS) or with prior incubation with the aptamer (IS only =  $0.29 \pm 0.03$ , APT+IS =  $0.72 \pm 0.05$ , \*\*\*\*  $p < 0.0001$  Welch's t-test). **(G)** Graphs showing the clusters per cell when imaged with only the IS or with prior incubation with the aptamer (IS only =  $40.5 \pm 7.8$ , APT+IS =  $123 \pm 13.0$ , \*\*\*\*  $p < 0.0001$  Welch's t-test). **(H)** Histogram showing the length of each cluster binned in 20 nm intervals in IS only and the with incubation of the aptamer (n = 400-1300 aggregates per condition). **(I)** Quantification of the change in cytosolic Ca<sup>2+</sup> amplitude ( $\Delta$ [Ca<sup>2+</sup>]<sub>c</sub>) after KCl addition in day 41 neurons (Ctrl =  $1.00 \pm 0.02$ , A53T =  $0.84 \pm 0.04$ , SNCA x3 =  $0.57 \pm 0.04$ , \*\*\*  $p = 0.0005$ , \*\*\*\*  $p < 0.0001$ , one-way ANOVA). **(J)** Representative ICC images showing day 48 mDA neurons immunolabelled with neuronal marker MAP2 (grey) and Ser129 phosphorylated  $\alpha$ -synuclein. Lower panel shows only phosphorylated  $\alpha$ -synuclein signal. Scale bar = 20  $\mu$ m. All values plotted as  $\pm$ SEM unless stated otherwise. All N numbers for each experiment can be found in supplementary table 5.

# Supplementary Figure 7

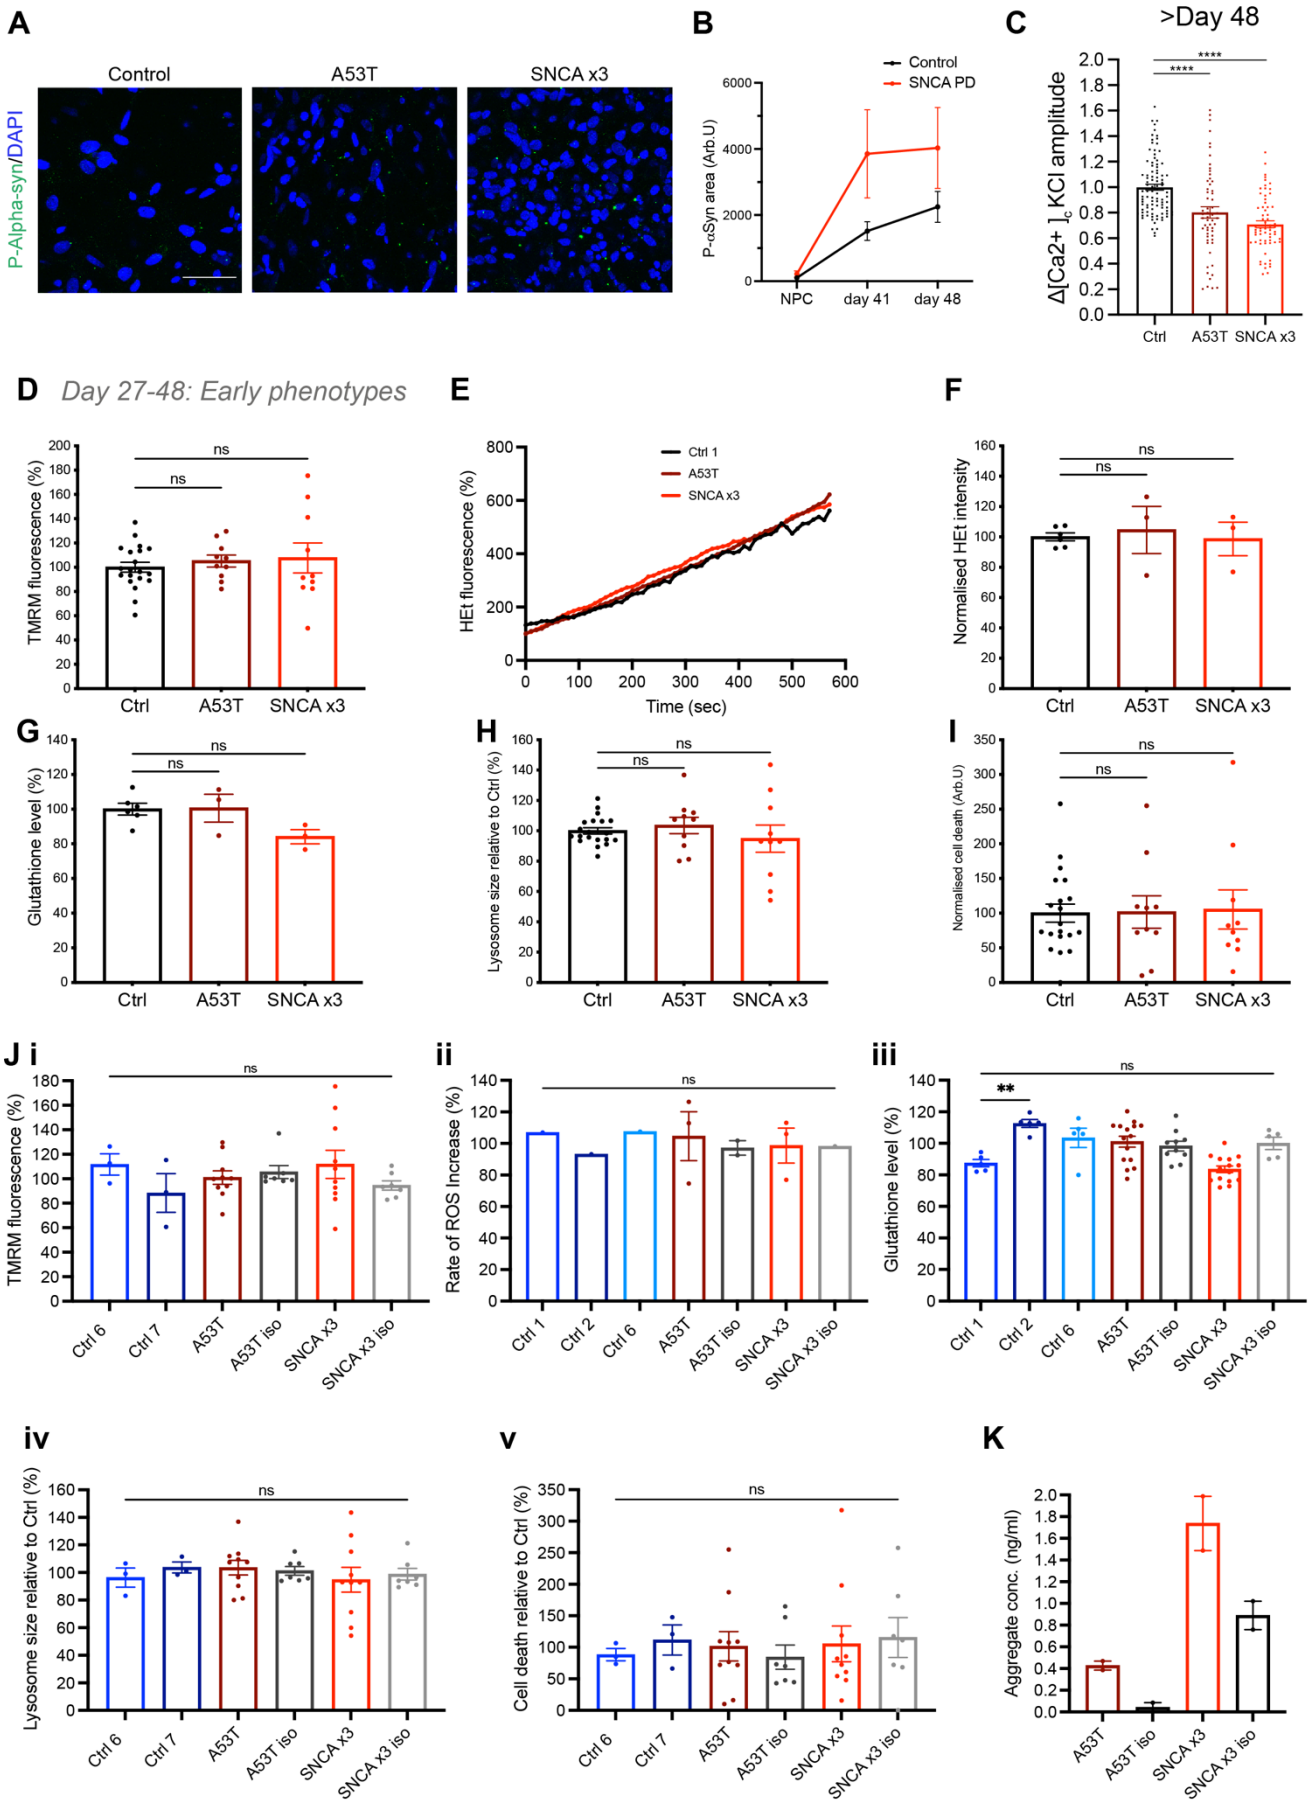

**Supplementary Figure 7 – Aggregation, calcium dysregulation and early cellular pathology in mDA neurons.**

(A) Representative ICC images showing phosphorylated  $\alpha$ -synuclein in green at day 48 of differentiation in control, A53T, and SNCA x3 lines. Scale bar = 50  $\mu$ m. (B) Line graph showing the normalised phosphorylated  $\alpha$ -synuclein area over time from NPCs through to day 48 of differentiation in control and SNCA PD lines. (C) Quantification of the change in cytosolic  $\text{Ca}^{2+}$  amplitude ( $\Delta[\text{Ca}^{2+}]_c$ ) after KCl addition in day 48 neurons (Ctrl =  $1.00 \pm 0.02$ , A53T =  $0.80 \pm 0.05$ , SNCA x3 =  $0.71 \pm 0.03$ , \*\*\*\*  $p < 0.0001$ , one-way ANOVA). (D) Quantification showing the TMRM fluorescence in early day 27-48 mDA neurons (Ctrl =  $100 \pm 4.1$ , A53T =  $105 \pm 5.0$ , SNCA x3 =  $108 \pm 12.4$ , ns  $p > 0.05$ , one-way ANOVA). (E) Representative control, A53T and SNCA x3 traces showing the HET fluorescence over time in day 27-48 mDA neurons. (F) Quantification showing the rate of ROS increase from the HET fluorescence in day 27-48 mDA neurons (Ctrl =  $100 \pm 2.7$ , A53T =  $105 \pm 15.5$ , SNCA x3 =  $99 \pm 11.1$ , ns  $p > 0.05$ , one-way ANOVA). (G) Quantification of the Glutathione fluorescence in day 27-48 mDA neurons (Ctrl =  $100 \pm 3.4$ , A53T =  $101 \pm 8.0$ , SNCA x3 =  $84 \pm 4.1$ , ns  $p > 0.05$ , one-way ANOVA). (H) Quantification showing the normalised lysosome size in day 27-48 mDA neurons (Ctrl =  $100 \pm 2.1$ , A53T =  $104 \pm 5.4$ , SNCA x3 =  $95 \pm 9.0$ , ns  $p > 0.05$ , one-way ANOVA). (I) Quantification showing the normalised basal cell death in day 27-48 mDA neurons (Ctrl =  $100 \pm 13.1$ , A53T =  $102 \pm 23.4$ , SNCA x3 =  $105 \pm 28.2$ , ns  $p > 0.05$ , one-way ANOVA). (J) Graphs showing the each of the early phenotypic assays performed above (day 27-48) split to show each cell line used for i: TMRM fluorescence, ii: rate of ROS increase (HET fluorescence), iii: Glutathione, iv: lysosome size, v: basal cell death (\*\*  $p < 0.005$ , ns  $p > 0.05$ , one-way ANOVA). (K) ELISA quantification showing the concentration of aggregated  $\alpha$ -synuclein in day 62 old neurons (A53T =  $0.43 \pm 0.04$ , A53T iso =  $0.04 \pm 0.04$ , SNCA x3 =  $1.74 \pm 0.25$ , SNCA x3 iso =  $0.89 \pm 0.13$ ). All values plotted as  $\pm$ SEM. All N numbers for each experiment can be found in supplementary table 5.

# Supplementary Figure 8

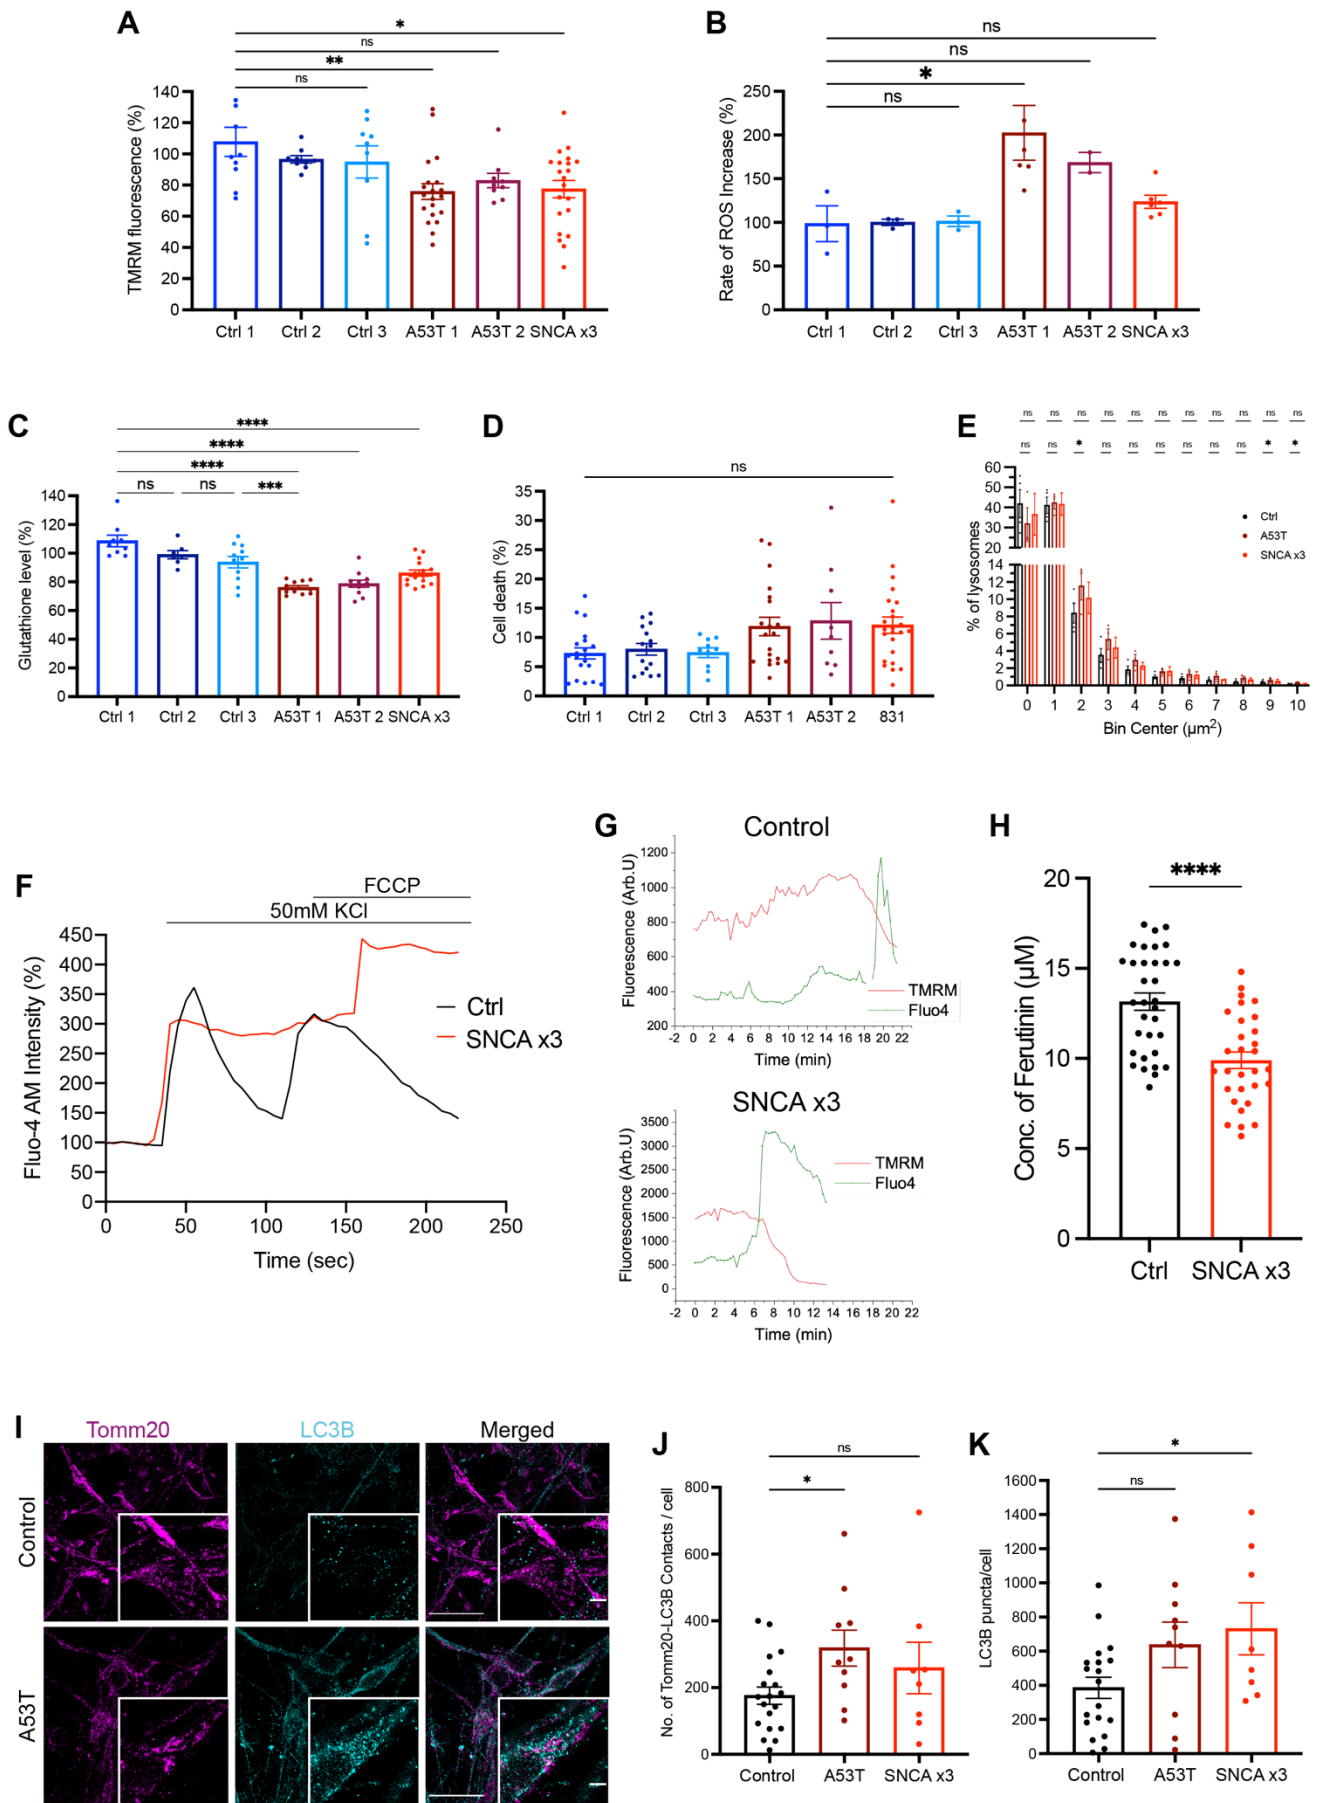

### Supplementary Figure 8 – Late cellular pathology in mDA neurons.

**(A)** TMRM fluorescence plotted out for each line tested in >day 48 mDA neurons (ns  $p > 0.05$ , \*  $p < 0.05$ , \*\*  $p < 0.005$ , one-way ANOVA). **(B)** Relative increase in ROS based on HET ratiometric fluorescence plotted out for each line tested in >day 48 mDA neurons (ns  $p > 0.05$ , \*  $p < 0.05$ , one-way ANOVA). **(C)** Relative percentage of endogenous glutathione levels based on MCB fluorescence plotted out for each line tested in >day 48 mDA neurons (ns  $p > 0.05$ , \*\*\*  $p < 0.0005$ , \*\*\*\*  $p < 0.0001$ , one-way ANOVA). **(D)** Basal cell death plotted out for each line tested in >day 48 mDA neurons (ns,  $p > 0.05$ , one-way ANOVA). **(E)** Histogram plot showing the percentage of total lysosomes in each set area bin ( $0-10\mu\text{m}^2$ ) plotted out for each induction (ns  $p > 0.05$ , \*  $p < 0.05$ , two-way ANOVA). **(F)** Representative single-cell trace showing Fluo-4 intensity in response to KCl and FCCP in day 62 mDA neurons. **(G)** Representative single-cell trace showing TMRM and Fluo-4 fluorescence as ferutinin is sequentially added to open mPTP in control and *SNCA* x3 day 62 neurons. **(H)** Quantification showing the concentration of ferutinin required for mPTP opening in control and *SNCA* x3 mDA neurons (Ctrl =  $13.2 \pm 0.5$ , *SNCA* x3 =  $9.9 \pm 0.5$ , \*\*\*\*  $p < 0.0001$ , Welch's t-test). **(I)** Structured illumination microscopy (SIM) images of control and A53T day 55 neurons probed for mitochondrial marker Tomm20, and the autophagosome marker LC3B. Scale bar = 20  $\mu\text{m}$ ). Smaller image depicts a zoom showing morphology and colocalization of the markers (scale bar = 2  $\mu\text{m}$ ). **(J)** Quantification of Tomm20/LC3B co-localisations in control, A53T, and *SNCA* x3 day 55 mDA neurons (Control =  $176 \pm 26$ , A53T =  $319 \pm 54$ , *SNCA* x3 =  $259 \pm 77$ , ns  $p > 0.05$ , \*  $p < 0.05$ , one-way ANOVA). **(K)** Quantification of LCB3 puncta per cell in control, A53T, and *SNCA* x3 neurons (Control =  $385 \pm 62$ , A53T =  $637 \pm 133$ , *SNCA* x3 =  $731 \pm 152$ , ns  $p > 0.05$ , \*  $p < 0.05$ , one-way ANOVA). All values plotted as  $\pm$ SEM. All N numbers for each experiment can be found in supplementary table 5.

**Supplementary Figure 9**

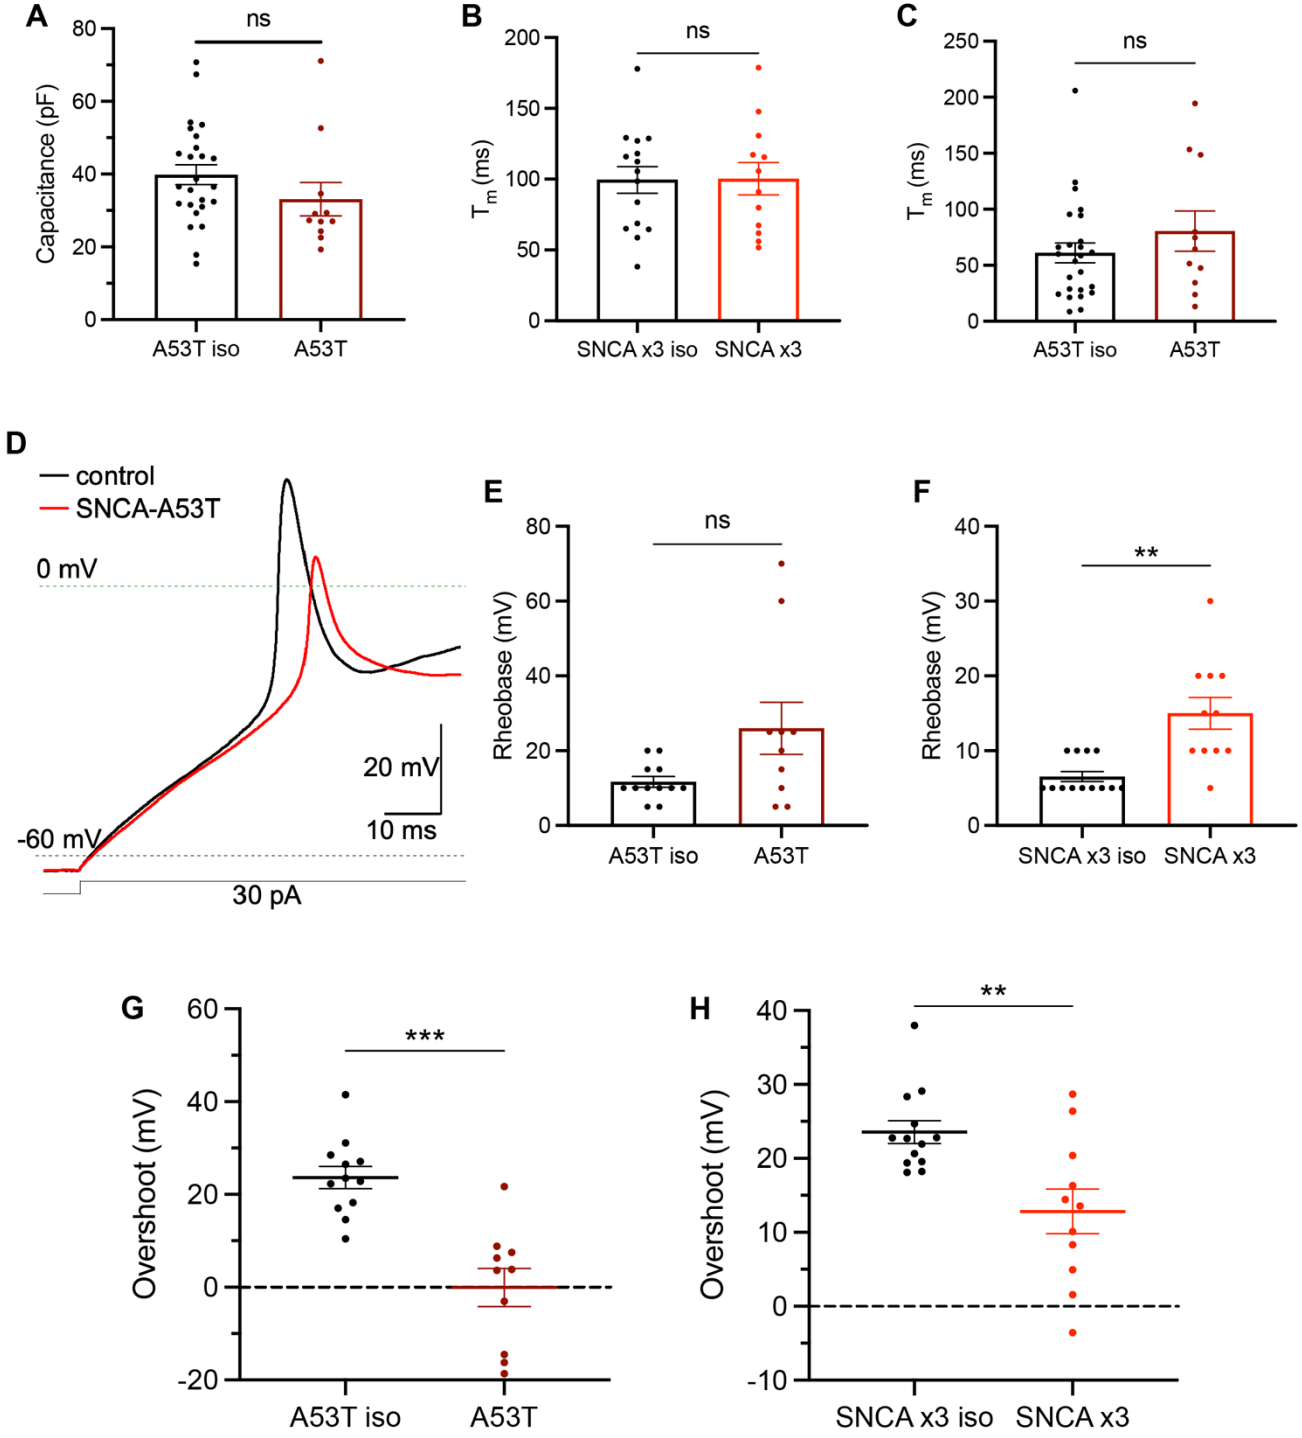



### Supplementary Figure 9 – Electrophysiological pathology in late mDA neurons.

**(A)** Quantification showing the membrane capacitance in >day 70 A53T isogenic and A53T mDA neurons (ns,  $p > 0.05$ , Welch's t-test). **(B)** Quantification showing the passive membrane property; time-constant in *SNCA* x3 isogenic and *SNCA* x3 mDA neurons (ns  $p > 0.05$ , Welch's t-test). **(C)** Quantification showing the time-constant in A53T isogenic and A53T mDA neurons (ns,  $p > 0.05$ ). **(D)** Representative trace showing current induced AP form in control and A53T mDA neurons. **(E)** Quantification showing the AP rheobase in A53T isogenic and A53T mDA neurons (A53T isogenic =  $11.7 \pm 1.4$ , A53T =  $26.0 \pm 7.0$ , ns  $p > 0.05$ , Welch's t-test). **(F)** Quantification showing the AP rheobase in *SNCA* x3 isogenic and *SNCA* x3 mDA neurons (*SNCA* x3 isogenic =  $6.5 \pm 0.67$ , *SNCA* x3 =  $15.0 \pm 2.13$ , \*\*  $p = 0.0026$ , Welch's t-test). **(G)** Quantification of the AP overshoot in A53T isogenic and A53T mDA neurons (A53T isogenic =  $23.6 \pm 2.4$ , A53T =  $-0.05 \pm 4.1$ , \*\*\*  $p = 0.0002$ , Welch's t-test). **(H)** Quantification of the AP overshoot in *SNCA* x3 isogenic and *SNCA* x3 mDA neurons (*SNCA* x3 isogenic =  $23.6 \pm 1.5$ , *SNCA* x3 =  $12.8 \pm 3.0$ , \*\*  $p = 0.0062$ , Welch's t-test). All values plotted as  $\pm$ SEM. All N numbers for each experiment can be found in supplementary table 5.

**Supplementary Table 1. hiPSC lines used in this study**

| hiPSC line                 | Mutation      | Age of donor | Sex of donor | Source                                           | RRID      |
|----------------------------|---------------|--------------|--------------|--------------------------------------------------|-----------|
| No disease Control 1       | None          | 78           | Male         | Reprogrammed in house, Kunath lab EDi046-A       |           |
| No disease Control 2       | None          | 51           | Male         | Cedars Sinai iPSC Core Repository CS0002iCTR-nxx |           |
| No disease Control 3       | None          | Unknown      | Female       | Thermo Fisher Scientific A18945                  | CVCL_RM92 |
| No disease Control 4       | None          | 64           | Male         | Coriell ND41866                                  | CVCL_Y838 |
| No disease Control 5       | None          | 60-64        | Female       | EBiSC WTSli017-B HPSI0114i-lexy_1                | CVCL_AE31 |
| No disease Control 6       | None          | 55-59        | Male         | EBiSC WTSli018-A HPSI0114i-kolf_3                | CVCL_AE30 |
| No disease Control 7       | None          | 55-59        | Male         | EBiSC WTSli019-B HPSI0114i-iisa_1                | CVCL_AE22 |
| A53T 1 & isogenic control  | SNCA A53T     | 54           | Female       | StemBANCC SFC828 (STBCi019-A)                    | CVCL_RB71 |
| A53T 2                     | SNCA A53T     | 57           | Male         | StemBANCC SFC829 (STBCi023-C)                    | CVCL_RB78 |
| SNCA x3                    | SNCA locus x3 | Unknown      | Female       | StemBANCC SFC831 (STBCi024-C)                    | CVCL_RB81 |
| SNCA x3 & isogenic control | SNCA locus x3 | Unknown      | Female       | As reported <sup>54</sup> EDi001-B               | CVCL_ZA47 |

**Supplementary Table 2. List of antibodies used in this study.**

| <b>Protein</b>                           | <b>Company</b>               | <b>Catalogue</b> | <b>RRID</b> | <b>Species</b> | <b>Dilution</b>             |
|------------------------------------------|------------------------------|------------------|-------------|----------------|-----------------------------|
| LMX1A                                    | Abcam                        | ab139726         | AB_2827684  | Rabbit         | 1:500                       |
| FOXA2                                    | Santa-Cruz<br>Biotechnology  | sc-374376        | AB_10989742 | Mouse          | 1:100                       |
| OTX2                                     | R & D Systems                | AF1979           | AB_2157172  | Goat           | 1:500                       |
| TH                                       | Abcam                        | ab137869         | AB_2801410  | Rabbit         | 1:500 (ICC)<br>1:200 (Flow) |
| TH                                       | Abcam                        | ab76442          | AB_1524535  | Chicken        | 1:500                       |
| TUJ1                                     | Biolegend                    | 801201           | AB_2313773  | Mouse          | 1:1000 (ICC)                |
| Beta III Tubulin                         | Abcam                        | ab41489          | AB_727049   | Chicken        | 1:500 (ICC)<br>1:200 (Flow) |
| MAP2                                     | Abcam                        | ab11267          | AB_297885   | Mouse          | 1:500                       |
| GIRK2                                    | Alomone Labs                 | APC-006          | AB_2040115  | Rabbit         | 1:400                       |
| Total alpha-synuclein                    | Abcam                        | ab138501         | AB_2537217  | Rabbit         | 1:200                       |
| Filament alpha-synuclein                 | Abcam                        | ab209538         | AB_2714215  | Rabbit         | 1:50-1:100                  |
| Tomm20                                   | Santa-Cruz                   | sc-17764         | AB_628381   | Mouse          | 1:1000                      |
| LC3B                                     | Cell Signaling<br>Technology | #3868            | AB_2137707  | Rabbit         | 1:300                       |
| LC3B                                     | Abcam                        | ab48394          | AB_881433   | Rabbit         | 1:2000                      |
| Phosphorylated alpha-synuclein           | Abcam                        | ab51253          | AB_869973   | Rabbit         | 1:1000                      |
| Goat pAb anti-Mouse IgG Alexa Fluor 488  | Abcam                        | ab150113         | AB_2576208  | Goat           | 1:500                       |
| Goat pAb anti-Mouse IgG Alexa Fluor 555  | Abcam                        | ab150114         | AB_2687594  | Goat           | 1:500                       |
| Goat pAb anti-Mouse IgG Alexa Fluor 647  | Abcam                        | ab150115         | AB_2687948  | Goat           | 1:500                       |
| Goat pAb anti-Rabbit IgG Alexa Fluor 488 | Abcam                        | ab150077         | AB_2630356  | Goat           | 1:500                       |

|                                           |       |          |            |      |       |
|-------------------------------------------|-------|----------|------------|------|-------|
| Goat pAb anti-Rabbit IgG Alexa Fluor 555  | Abcam | ab150078 | AB_2722519 | Goat | 1:500 |
| Goat pAb anti-Rabbit IgG Alexa Fluor 647  | Abcam | ab150079 | AB_2722623 | Goat | 1:500 |
| Goat pAb anti-Chicken IgG Alexa Fluor 647 | Abcam | ab150171 | AB_2921318 | Goat | 1:500 |

**Supplementary Table 3. List of TaqMan™ Gene Expression probes used in this study.**

| <b>Gene</b>  | <b>Catalogue Number</b> |
|--------------|-------------------------|
| <i>FOXA2</i> | Hs00232764_m1           |
| <i>LMX1A</i> | Hs00898455_m1           |
| <i>EN1</i>   | Hs00154977_m1           |
| <i>TH</i>    | Hs00165941_m1           |
| <i>Nurr1</i> | Hs00428691_m1           |
| <i>DAT</i>   | Hs00997374_m1           |
| <i>GIRK2</i> | Hs01040524_m1           |
| <i>SNCA</i>  | Hs00240906_m1           |
| <i>GAPDH</i> | Hs03929097_g1           |

**Supplementary table 7: Protocols used in this study deposited on Protocols.io**

| <b>Protocol</b>                                                                        | <b>DOI</b>                                                                                                             |
|----------------------------------------------------------------------------------------|------------------------------------------------------------------------------------------------------------------------|
| Human iPSC cell culture                                                                | <a href="https://doi.org/10.17504/protocols.io.81wgby7dnvpk/v1">dx.doi.org/10.17504/protocols.io.81wgby7dnvpk/v1</a>   |
| Generation of midbrain dopaminergic neurons                                            | <a href="https://doi.org/10.17504/protocols.io.x54v9j7ezg3e/v1">dx.doi.org/10.17504/protocols.io.x54v9j7ezg3e/v1</a>   |
| Single-cell RNA-seq                                                                    | <a href="https://doi.org/10.17504/protocols.io.6qpvr4dixpgmk/v1">dx.doi.org/10.17504/protocols.io.6qpvr4dixpgmk/v1</a> |
| Live-cell imaging: Calcium                                                             | <a href="https://doi.org/10.17504/protocols.io.3byl4j7e8lo5/v1">dx.doi.org/10.17504/protocols.io.3byl4j7e8lo5/v1</a>   |
| Live-cell imaging: Mitochondria membrane potential                                     | <a href="https://doi.org/10.17504/protocols.io.e6nvwj997lmk/v1">dx.doi.org/10.17504/protocols.io.e6nvwj997lmk/v1</a>   |
| Live-cell imaging: Cell death                                                          | <a href="https://doi.org/10.17504/protocols.io.n2bvj8yywgk5/v1">dx.doi.org/10.17504/protocols.io.n2bvj8yywgk5/v1</a>   |
| Live-cell imaging: Reactive oxygen species (Superoxide)                                | <a href="https://doi.org/10.17504/protocols.io.5qpvr55zv4o/v1">dx.doi.org/10.17504/protocols.io.5qpvr55zv4o/v1</a>     |
| Fluorescent false neurotransmitter (FFN) DAT imaging                                   | <a href="https://doi.org/10.17504/protocols.io.36wgqj55xvk5/v1">dx.doi.org/10.17504/protocols.io.36wgqj55xvk5/v1</a>   |
| Quantitative polymerase chain reaction (qPCR)                                          | <a href="https://doi.org/10.17504/protocols.io.36wgqj5rkvk5/v1">dx.doi.org/10.17504/protocols.io.36wgqj5rkvk5/v1</a>   |
| Immunocytochemistry                                                                    | <a href="https://doi.org/10.17504/protocols.io.q26g74w79gwz/v1">dx.doi.org/10.17504/protocols.io.q26g74w79gwz/v1</a>   |
| Sample preparation for single molecule localisation microscopy and iSIM and microscopy | <a href="https://doi.org/10.17504/protocols.io.3byl4j77olo5/v1">dx.doi.org/10.17504/protocols.io.3byl4j77olo5/v1</a>   |
| Flow Cytometry                                                                         | <a href="https://doi.org/10.17504/protocols.io.kqdg3956eg25/v1">dx.doi.org/10.17504/protocols.io.kqdg3956eg25/v1</a>   |
| High Performance Liquid Chromatography (HPLC) and sample preparation                   | <a href="https://doi.org/10.17504/protocols.io.yxmvm2ko5g3p/v1">dx.doi.org/10.17504/protocols.io.yxmvm2ko5g3p/v1</a>   |
| Electrophysiology                                                                      | <a href="https://doi.org/10.17504/protocols.io.4r3l274mjg1y/v1">dx.doi.org/10.17504/protocols.io.4r3l274mjg1y/v1</a>   |
| Proteomic sample preparation and analysis                                              | <a href="https://doi.org/10.17504/protocols.io.kxygxzrokv8j/v1">dx.doi.org/10.17504/protocols.io.kxygxzrokv8j/v1</a>   |
